# Supplementary material for: Evidence for chiral discrimination of ruthenium(ii) polypyridyl complexes by DNAElectronic supplementary information (ESI) available: absorption spectra. See http://www.rsc.org/suppdata/dt/b2/b208147d/
Source: Royal Society of Chemistry journal article supplement (doi:10.1039/b208147d), 2002-12-10
Supplement: b208147d.pdf [file b208147d.pdf]

## Evidence for chiral discrimination of Ruthenium(II) polypyridyl complexes by DNA

Paul P. Pellegrini and Janice R. Aldrich-Wright\*.

*College of Science Technology and Environment, School of Science, Food and Horticulture, University of Western Sydney, Penrith South NSW, Australia. Fax: (+61) 246203025; Tel: (+61) 246203218; E-mail: [J.Aldrich-Wright@uws.edu.au](mailto:J.Aldrich-Wright@uws.edu.au)*

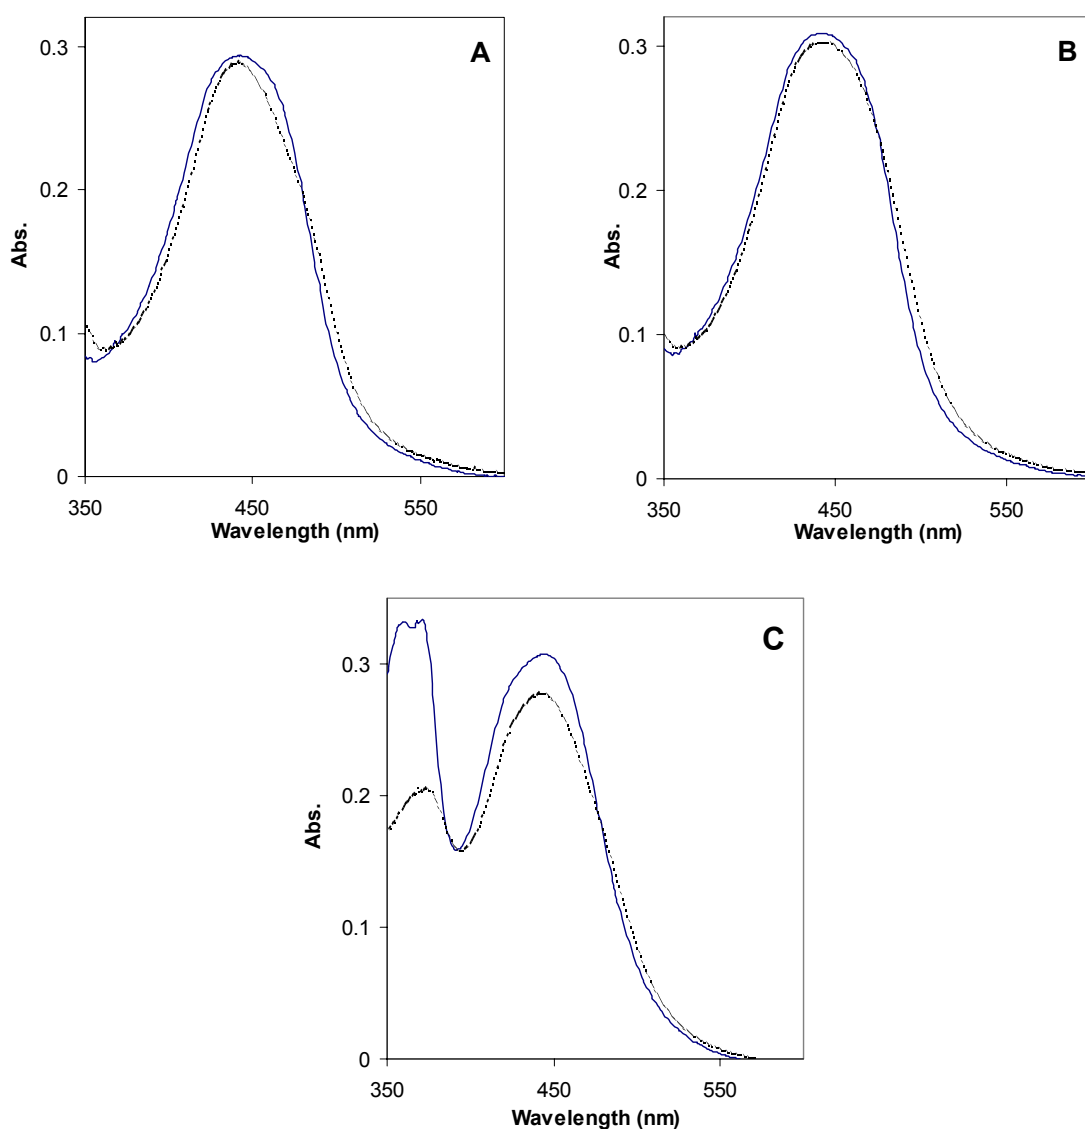

Absorption Spectra of (A)  $\Delta$ -[Ru(DMB)<sub>2</sub>dppq]<sup>2+</sup>, (B)  $\Lambda$ -[Ru(DMB)<sub>2</sub>dppq]<sup>2+</sup> and (C) *rac*-[Ru(DMB)<sub>2</sub>dppz]<sup>2+</sup> in the Absence (—) and Presence (---) of CT-DNA. Concentrations of metal complex and DNA base pairs were 20  $\mu$ M and 200  $\mu$ M respectively.
